# Supplementary material for: Non-noble-metal TiC-nanoparticle-promoted charge separation and photocatalytic degradation performance on Bi2O3 microrods: degradation pathway and mechanism investigation
Source: Royal Society of Chemistry journal article supplement (doi:10.1039/d3cp03740a), 2023-01-01
Supplement: d3cp03740a1.pdf [file d3cp03740a1.pdf]

**Supplementary Material**

**Non-noble-metal TiC nanoparticles promoted charge  
separation and photocatalytic degradation performance on  
Bi<sub>2</sub>O<sub>3</sub> microrods: degradation pathway and mechanism  
investigation**

Tao Xian <sup>1\*</sup>, Ke Ma <sup>1</sup>, Lijing Di <sup>1\*</sup>, Xuelian Ma <sup>1</sup>, Xiaofeng Sun <sup>3</sup> and Hua Yang <sup>2</sup>

<sup>1</sup> College of Physics and Electronic Information Engineering, Qinghai Normal  
University, Xining 810008, China

<sup>2</sup> School of Science, Lanzhou University of Technology, Lanzhou 730050, China

<sup>3</sup> State Key Laboratory of Advanced Processing and Recycling of Non-ferrous Metals,  
Lanzhou University of Technology, Lanzhou 730050, China

## Photoelectrochemical detection

The electrochemical impedance spectroscopy (EIS) was performed on an electrochemical workstation (CHI660E) with a three-electrode cell system. In this electrode system, the platinum foil and standard calomel electrode were used as the counter electrode and reference electrode, respectively. The fabrication of working electrode was as follows: 15 mg sample, 0.75 mg carbon black and 0.75 mg polyvinylidene fluoride (PVDF) were dissolved in 1-methyl-2-pyrrolidione (NMP) to obtain slurry. Then, the slurry was evenly coated on a  $1.0 \times 1.0 \text{ cm}^2$  fluoride-doped tin oxide glass electrode, which was then heated at  $60 \text{ }^\circ\text{C}$  for 5 h.  $\text{Na}_2\text{SO}_4$  aqueous solution ( $0.1 \text{ mol}\cdot\text{L}^{-1}$ ) was employed as the electrolyte. The EIS test was performed by using the sinusoidal voltage pulse with amplitude of 5 mV with frequency range from  $10^{-2}$  to  $10^5$  Hz.

Table S1 The Fukui index (nucleophilic index  $f^+$ , electrophilic index  $f^-$  and  $f^0$ ) and the condensed dual descriptor (CDD) of AO7

| No | Atom | q(N)    | q(N+1)  | q(N-1)  | $f^-$  | $f^+$  | $f^0$  | CDD     |
|----|------|---------|---------|---------|--------|--------|--------|---------|
| 1  | C    | -0.039  | -0.066  | 0.0047  | 0.0437 | 0.027  | 0.0353 | -0.0166 |
| 2  | C    | -0.0366 | -0.059  | 0.0127  | 0.0493 | 0.0224 | 0.0359 | -0.0268 |
| 3  | C    | -0.0021 | -0.0141 | 0.0099  | 0.012  | 0.012  | 0.012  | 0       |
| 4  | C    | -0.0024 | -0.0088 | 0.0056  | 0.008  | 0.0064 | 0.0072 | -0.0015 |
| 5  | C    | -0.0378 | -0.0402 | 0.0044  | 0.0422 | 0.0024 | 0.0223 | -0.0398 |
| 6  | C    | -0.0348 | -0.0655 | 0.0105  | 0.0453 | 0.0307 | 0.038  | -0.0145 |
| 7  | H    | 0.051   | 0.0255  | 0.0809  | 0.0299 | 0.0255 | 0.0277 | -0.0044 |
| 8  | H    | 0.0479  | 0.0276  | 0.0752  | 0.0273 | 0.0203 | 0.0238 | -0.007  |
| 9  | H    | 0.0466  | 0.029   | 0.072   | 0.0255 | 0.0176 | 0.0215 | -0.0079 |
| 10 | C    | -0.0287 | -0.0772 | 0.0375  | 0.0662 | 0.0484 | 0.0573 | -0.0177 |
| 11 | C    | 0.0205  | 0.0155  | 0.0653  | 0.0448 | 0.005  | 0.0249 | -0.0398 |
| 12 | H    | 0.0432  | 0.0387  | 0.0616  | 0.0183 | 0.0046 | 0.0114 | -0.0138 |
| 13 | H    | 0.0496  | 0.0298  | 0.0762  | 0.0267 | 0.0197 | 0.0232 | -0.007  |
| 14 | C    | 0.0722  | 0.0466  | 0.1131  | 0.0408 | 0.0257 | 0.0333 | -0.0152 |
| 15 | C    | -0.0499 | -0.0686 | -0.0144 | 0.0355 | 0.0187 | 0.0271 | -0.0168 |
| 16 | H    | 0.053   | 0.0323  | 0.0787  | 0.0256 | 0.0207 | 0.0232 | -0.0049 |
| 17 | O    | -0.2143 | -0.2235 | -0.1859 | 0.0284 | 0.0092 | 0.0188 | -0.0192 |
| 18 | H    | 0.1794  | 0.1636  | 0.2001  | 0.0207 | 0.0157 | 0.0182 | -0.005  |
| 19 | N    | -0.0571 | -0.187  | 0.0026  | 0.0598 | 0.1298 | 0.0948 | 0.07    |
| 20 | N    | -0.0594 | -0.2091 | 0.0258  | 0.0852 | 0.1498 | 0.1175 | 0.0646  |
| 21 | C    | 0.046   | 0.0329  | 0.0496  | 0.0036 | 0.0131 | 0.0084 | 0.0095  |
| 22 | C    | -0.0181 | -0.0519 | 0.0006  | 0.0187 | 0.0338 | 0.0263 | 0.015   |
| 23 | C    | -0.0317 | -0.0593 | -0.0159 | 0.0158 | 0.0276 | 0.0217 | 0.0118  |
| 24 | C    | -0.0103 | -0.0409 | 0.0088  | 0.0191 | 0.0306 | 0.0249 | 0.0115  |
| 25 | H    | 0.0642  | 0.0429  | 0.0765  | 0.0122 | 0.0213 | 0.0168 | 0.0091  |
| 26 | C    | -0.0242 | -0.0535 | -0.0056 | 0.0186 | 0.0293 | 0.024  | 0.0107  |
| 27 | H    | 0.0518  | 0.0347  | 0.0612  | 0.0094 | 0.0171 | 0.0132 | 0.0077  |
| 28 | C    | -0.0078 | -0.0492 | 0.0198  | 0.0275 | 0.0415 | 0.0345 | 0.0139  |
| 29 | H    | 0.0652  | 0.0436  | 0.0798  | 0.0147 | 0.0216 | 0.0181 | 0.0069  |
| 30 | H    | 0.0577  | 0.0356  | 0.0735  | 0.0158 | 0.0221 | 0.019  | 0.0063  |
| 31 | S    | 0.5201  | 0.4996  | 0.5319  | 0.0119 | 0.0205 | 0.0162 | 0.0086  |
| 32 | O    | -0.361  | -0.3975 | -0.3264 | 0.0347 | 0.0365 | 0.0356 | 0.0018  |
| 33 | O    | -0.3641 | -0.4043 | -0.325  | 0.0391 | 0.0402 | 0.0397 | 0.0011  |
| 34 | O    | -0.1959 | -0.2124 | -0.1833 | 0.0126 | 0.0165 | 0.0145 | 0.004   |
| 35 | H    | 0.2066  | 0.1901  | 0.2179  | 0.0114 | 0.0165 | 0.0139 | 0.0051  |

Table S2 Toxicity analysis result of AO7 and its intermediates

| Substance | Acute toxicity                              | Bioaccumulation factor | Developmental toxicity |                            |
|-----------|---------------------------------------------|------------------------|------------------------|----------------------------|
|           | Daphnia magna LC <sub>50</sub> (48h) (mg/L) | Predicted value        | Predicted value        | Predicted result           |
| AO7       | 3.3                                         | 7.34                   | 0.89                   | Developmental toxicant     |
| P1        | 3.21                                        | 3.73                   | 0.59                   | Developmental toxicant     |
| P2        | 314.67                                      | 2.7                    | 0.55                   | Developmental toxicant     |
| P3        | 92.03                                       | 1.83                   | 0.62                   | Developmental toxicant     |
| P4        | 990.46                                      | 1.59                   | 0.84                   | Developmental toxicant     |
| P5        | 3180.55                                     | 0.01                   | 0.61                   | Developmental toxicant     |
| P6        | 239.77                                      | 2.81                   | 0.88                   | Developmental toxicant     |
| P7        | 1638.12                                     | 0.02                   | 0.46                   | Developmental non-toxicant |
| P8        | 177.21                                      | 0.52                   | 0.48                   | Developmental non-toxicant |

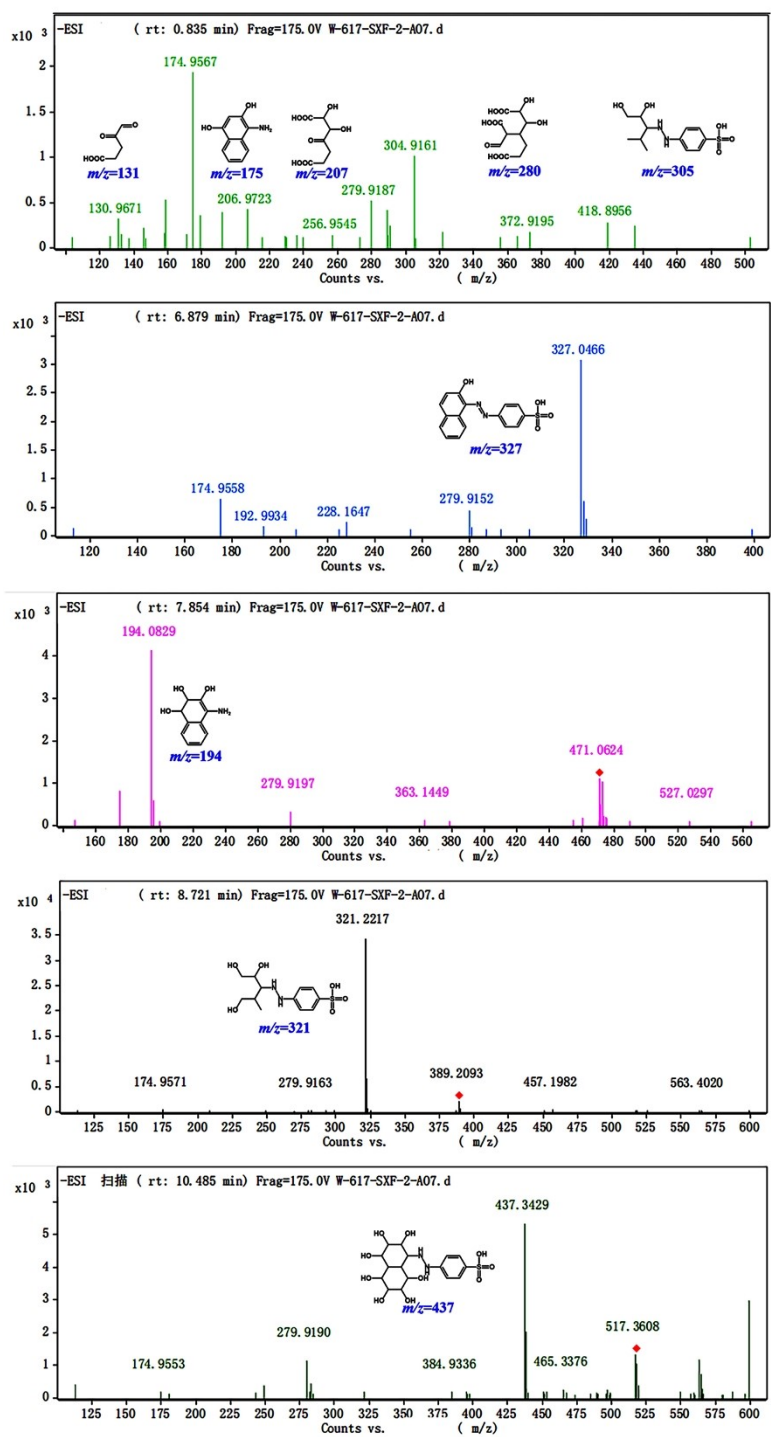

Fig. S1. The mass-to-charge ratio ( $m/z$ ) of intermediates and the corresponding possible molecular structure

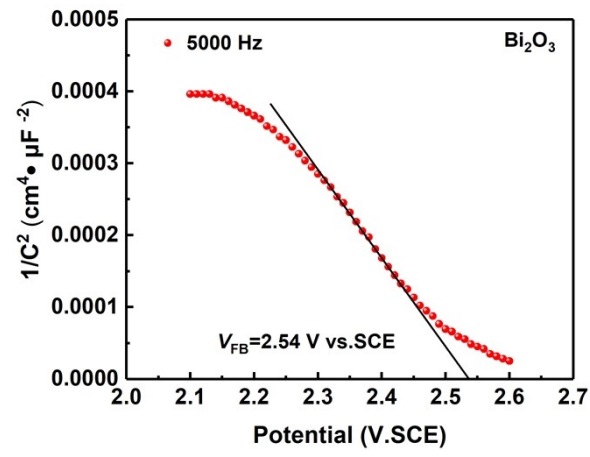

Fig. S2. Mott-Schottky (M-S) plot of bare  $\text{Bi}_2\text{O}_3$
